# Supplementary material for: Association between Psychological Disorders, Mediterranean Diet, and Chronotype in a Group of Italian Adults
Source: MDPI journal article supplement (doi:10.3390/ijerph20010335), 2022-12-26

**Figure S1.** Correlation analysis between Medi-Lite total score and depression, anxiety and stress subscale scores.

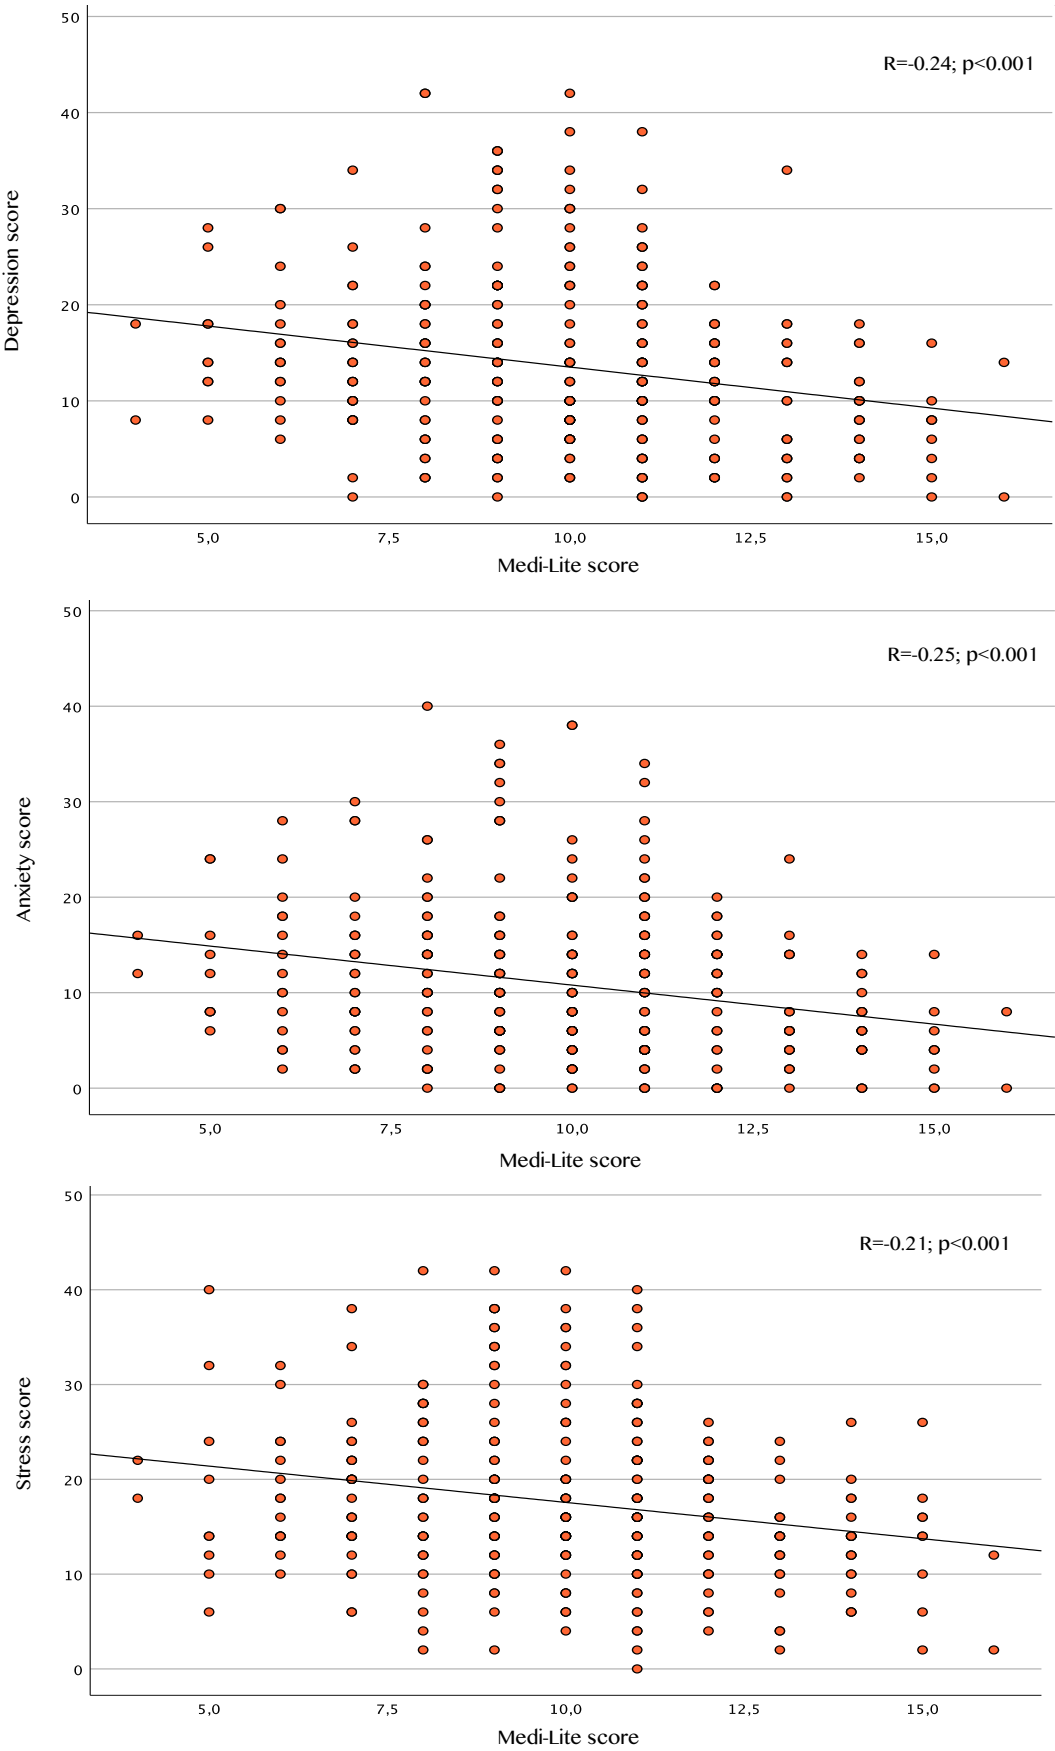

Supplement: s1 [file s1]
